# Supplementary material
Source: publisher figshare collection journal article supplement (https://gsajournals.figshare.com/ndownloader/files/15112100)
Supplement: Supplementary file 1 [file 15112100]

## Sheet: Sheet1
GFP strain	View	# cell with extra foci	# cells with normal foci	# Dead cells	Total	Total alive
Bbp1	1	5	24	9	38	29
Bbp1	2	4	23	3	30	27
Bbp1	3	5	20	2	27	25
Bbp1	Total	14	67	14	95	81
Mps2	1	8	33	7	48	41
Mps2	2	1	35	3	39	36
Mps2	3	3	35	3	41	38
Mps2	Total	12	103	13	128	115
Nbp1	1	3	27	4	34	30
Nbp1	2	0	24	3	27	24
Nbp1	3	2	35	4	41	37
Nbp1	Total	5	86	11	102	91
YPR071W	1	19	26	11	56	45
YPR071W	2	10	25	5	40	35
YPR071W	Total	29	51	16	96	80
Apq12	1	5	15	4	24	20
Apq12	2	1	19	8	28	20
Apq12	3	8	16	5	29	24
Apq12	Total	14	50	17	81	64
YJL021C	1	8	5	3	16	13
YJL021C	2	5	7	0	12	12
YJL021C	3	5	6	1	12	11
YJL021C	4	4	6	1	11	10
YJL021C	Total	22	24	5	51	46
YDL121C	1	0	37	9	46	37
YDL121C	2	4	33	9	46	37
YDL121C	3	4	48	10	62	52
YDL121C	Total	8	118	28	154	126
Nsp1	1	10	16	7	33	26
Nsp1	2	7	20	8	35	27
Nsp1	3	8	25	13	46	33
Nsp1	Total	25	61	28	114	86
Nup133	1	9	17	7	33	26
Nup133	2	3	13	8	24	16
Nup133	3	1	11	5	17	12
Nup133	Total	13	41	20	74	54
Nup170	Total	11	147	25	183	158
Pom34	1	4	23	21	48	27
Pom34	2	4	34	13	51	38
Pom34	3	5	16	5	26	21
Pom34	Total	13	73	39	125	86
Ndc1	1	0	7	4	11	7
Ndc1	2	1	6	4	11	7
Ndc1	3	0	6	2	8	6
Ndc1	4	1	8	0	9	9
Ndc1	Total	2	27	10	39	29
Nic96	1	6	25	6	37	31
Nic96	2	4	16	35	55	20
Nic96	3	14	19	4	37	33
Nic96	Total	24	60	45	129	84
YPR114W	1	0	3	14	17	3
YPR114W	2	3	4	4	11	7
YPR114W	3	1	5	1	7	6
YPR114W	Total	4	12	19	35	16
